# Supplementary material
Source: MDPI journal article supplement (https://www.mdpi.com/2071-1050/13/11/5790)
Supplement: s1 [file s1]

## Supplementary Material

The Influence of The Textural Characteristics of The Hierarchical Porous Carbons on The Removal of Lead and Cadmium Ions From Aqueous Solution

Turki N. Baroud

Department of Mechanical Engineering, King Fahd University of Petroleum and Mineral, Dhahran, 31261, Saudi Arabia.

Corresponding authors. Email: turkibaroud@kfupm.edu.sa (Turki N. Baroud)

**Table S1.** CCD matrix of the experiment showing the factor combination and the responses.

| STD | RUN | Initial<br>Conc.(mg/L) | Adsorbent<br>Dosage (g/L) | pH | Cd <sup>2+</sup><br>Exp (mg/g) | Cd <sup>2+</sup><br>Pred.(mg/g) | Pb <sup>2+</sup><br>Exp (mg/g) | Pb <sup>2+</sup><br>Pred.(mg/g) |
|-----|-----|------------------------|---------------------------|----|--------------------------------|---------------------------------|--------------------------------|---------------------------------|
| 18  | 1   | 55                     | 3                         | 5  | 7.389                          | 7.463                           | 16.28                          | 15.96                           |
| 2   | 2   | 100                    | 1                         | 3  | 7.029                          | 7.099                           | 18.36                          | 17.81                           |
| 9   | 3   | 10                     | 3                         | 5  | 2.886                          | 2.829                           | 4.85                           | 4.95                            |
| 14  | 4   | 55                     | 3                         | 7  | 8.415                          | 8.248                           | 15.96                          | 16.28                           |
| 5   | 5   | 10                     | 1                         | 7  | 5.259                          | 5.312                           | 6.30                           | 6.11                            |
| 1   | 6   | 10                     | 1                         | 3  | 0.720                          | 0.730                           | 2.77                           | 2.70                            |
| 11  | 7   | 55                     | 1                         | 5  | 6.753                          | 6.424                           | 10.59                          | 11.59                           |
| 16  | 8   | 55                     | 3                         | 5  | 7.316                          | 7.463                           | 16.12                          | 15.96                           |
| 3   | 9   | 10                     | 5                         | 3  | 2.019                          | 2.015                           | 6.82                           | 6.89                            |
| 6   | 10  | 100                    | 1                         | 7  | 7.691                          | 7.846                           | 17.81                          | 17.46                           |
| 4   | 11  | 100                    | 5                         | 3  | 7.243                          | 7.243                           | 48.42                          | 48.91                           |
| 8   | 12  | 100                    | 5                         | 7  | 10.591                         | 10.591                          | 86.49                          | 87.36                           |
| 17  | 13  | 55                     | 3                         | 5  | 7.389                          | 7.463                           | 15.80                          | 15.96                           |
| 12  | 14  | 55                     | 5                         | 5  | 9.025                          | 9.025                           | 29.96                          | 28.50                           |
| 19  | 15  | 55                     | 3                         | 5  | 7.171                          | 7.463                           | 16.28                          | 15.96                           |
| 10  | 16  | 100                    | 3                         | 5  | 6.686                          | 6.554                           | 24.05                          | 24.78                           |
| 20  | 17  | 55                     | 3                         | 5  | 7.389                          | 7.463                           | 16.44                          | 15.96                           |
| 7   | 18  | 10                     | 5                         | 7  | 5.641                          | 5.641                           | 6.30                           | 6.36                            |
| 13  | 19  | 55                     | 3                         | 3  | 7.463                          | 7.243                           | 16.44                          | 16.95                           |
| 15  | 20  | 55                     | 3                         | 5  | 7.389                          | 7.463                           | 16.44                          | 15.96                           |

**Table S2.** ANOVA result for Cd<sup>2+</sup> adsorption.

| Source                      | Sum of Squares | df | Mean Square | F-value | p-value  |             |
|-----------------------------|----------------|----|-------------|---------|----------|-------------|
| Model                       | 7.26           | 12 | 0.6047      | 536.17  | < 0.0001 | significant |
| A-Initial Conc<br>(mg/L)    | 0.3489         | 1  | 0.3489      | 309.35  | < 0.0001 |             |
| B-Adsorbent<br>Dosage (g/L) | 0.3019         | 1  | 0.3019      | 267.73  | < 0.0001 |             |
| C-pH                        | 0.0081         | 1  | 0.0081      | 7.16    | 0.0318   |             |
| AB                          | 0.0709         | 1  | 0.0709      | 62.82   | < 0.0001 |             |
| AC                          | 0.8038         | 1  | 0.8038      | 712.72  | < 0.0001 |             |
| BC                          | 0.0557         | 1  | 0.0557      | 49.36   | 0.0002   |             |
| A <sup>2</sup>              | 0.8318         | 1  | 0.8318      | 737.53  | < 0.0001 |             |
| B <sup>2</sup>              | 0.0013         | 1  | 0.0013      | 1.16    | 0.3175   |             |

|                       |        |    |        |        |          |
|-----------------------|--------|----|--------|--------|----------|
| <b>C<sup>2</sup></b>  | 0.0039 | 1  | 0.0039 | 3.45   | 0.1055   |
| <b>ABC</b>            | 0.1956 | 1  | 0.1956 | 173.44 | < 0.0001 |
| <b>A<sup>2</sup>C</b> | 0.2237 | 1  | 0.2237 | 198.36 | < 0.0001 |
| <b>AB<sup>2</sup></b> | 0.0377 | 1  | 0.0377 | 33.43  | 0.0007   |
| <b>Residual</b>       | 0.0079 | 7  | 0.0011 |        |          |
| <b>Pure Error</b>     | 0.0007 | 5  | 0.0001 |        |          |
| <b>Cor Total</b>      | 7.26   | 19 |        |        |          |

**Table S3.** ANOVA result for Pb<sup>2+</sup> adsorption.

| <b>Source</b>                   | <b>Sum of Squares</b> | <b>df</b> | <b>Mean Square</b> | <b>F-value</b> | <b>p-value</b> |             |
|---------------------------------|-----------------------|-----------|--------------------|----------------|----------------|-------------|
| <b>Model</b>                    | 11.63                 | 12        | 0.9692             | 351.92         | < 0.0001       | significant |
| <b>A-Initial Conc (mg/L)</b>    | 1.29                  | 1         | 1.29               | 469.14         | < 0.0001       |             |
| <b>B-Adsorbent Dosage (g/L)</b> | 2.03                  | 1         | 2.03               | 735.41         | < 0.0001       |             |
| <b>C-pH</b>                     | 0.0005                | 1         | 0.0005             | 0.1781         | 0.6857         |             |
| <b>AB</b>                       | 0.3404                | 1         | 0.3404             | 123.59         | < 0.0001       |             |
| <b>AC</b>                       | 0.0043                | 1         | 0.0043             | 1.55           | 0.2525         |             |
| <b>BC</b>                       | 0.0096                | 1         | 0.0096             | 3.50           | 0.1034         |             |
| <b>A<sup>2</sup></b>            | 0.3593                | 1         | 0.3593             | 130.46         | < 0.0001       |             |
| <b>B<sup>2</sup></b>            | 0.0519                | 1         | 0.0519             | 18.86          | 0.0034         |             |
| <b>C<sup>2</sup></b>            | 0.0050                | 1         | 0.0050             | 1.81           | 0.2199         |             |
| <b>ABC</b>                      | 0.2833                | 1         | 0.2833             | 102.86         | < 0.0001       |             |
| <b>A<sup>2</sup>C</b>           | 0.0509                | 1         | 0.0509             | 18.49          | 0.0036         |             |
| <b>AB<sup>2</sup></b>           | 0.0295                | 1         | 0.0295             | 10.71          | 0.0136         |             |
| <b>Residual</b>                 | 0.0193                | 7         | 0.0028             |                |                |             |
| <b>Pure Error</b>               | 0.0010                | 5         | 0.0002             |                |                |             |
| <b>Cor Total</b>                | 11.65                 | 19        |                    |                |                |             |

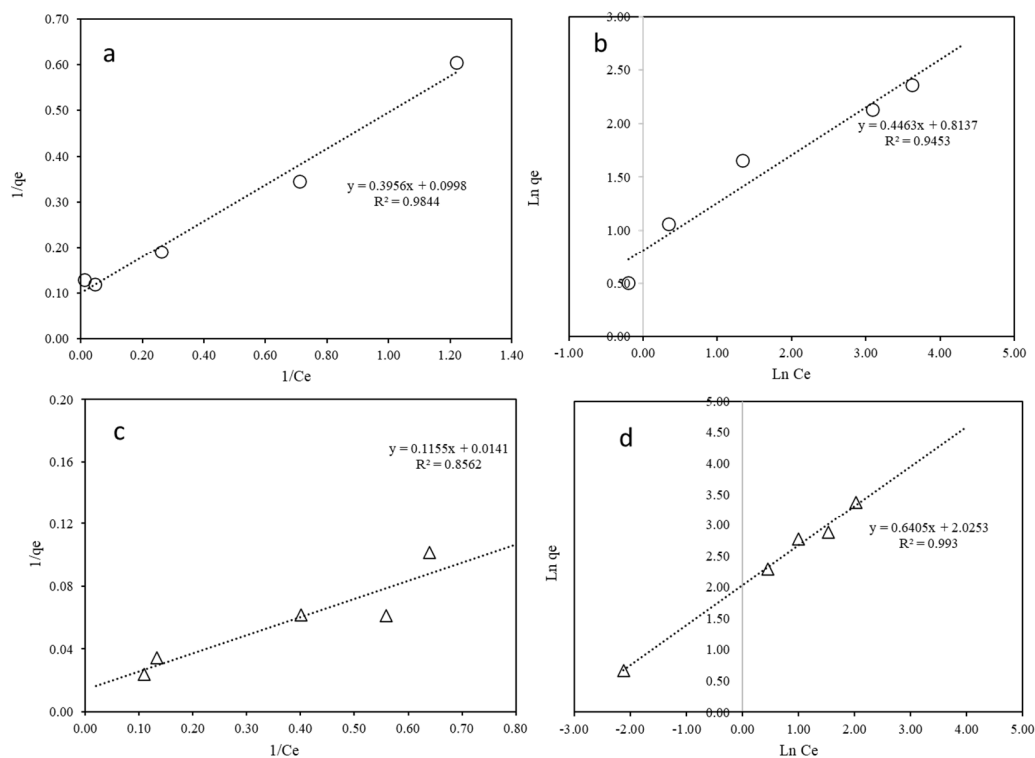

Figure S1. Langmuir and Freundlich isotherm plot for Cd<sup>2+</sup> (a,b), and Pb<sup>2+</sup> (c,d) adsorption.

Table S4. Isotherm parameters.

| Isotherm Model             | Cd <sup>2+</sup> | Pb <sup>2+</sup> |
|----------------------------|------------------|------------------|
| <b>Langmuir Isotherm</b>   |                  |                  |
| $q_m$ (mg/g)               | 10.02            | 70.92            |
| $K_L$ (L/mg)               | 0.2522           | 0.122            |
| $R^2$                      | 0.9844           | 0.8562           |
| <b>Freundlich Isotherm</b> |                  |                  |
| $n$                        | 2.24             | 1.56             |
| $k_F$                      | 2.26             | 7.58             |
| $R^2$                      | 0.945            | 0.993            |

Table S5. Comparison of adsorption capacities of some non-functionalized carbon adsorbents for Cd<sup>2+</sup> and Pb<sup>2+</sup>.

| Adsorbent Type                     | Surface area (m <sup>2</sup> /g) | Micropore area (m <sup>2</sup> /g) | Total pore volume (cm <sup>3</sup> /g) | Micropore volume (cm <sup>3</sup> /g) | Average pore size (nm) | Cd <sup>2+</sup> q <sub>e</sub> (mg/g) | Pb <sup>2+</sup> q <sub>e</sub> (mg/g) | Ref. |
|------------------------------------|----------------------------------|------------------------------------|----------------------------------------|---------------------------------------|------------------------|----------------------------------------|----------------------------------------|------|
| Activated Carbon from waste tire   | 265                              | 187                                | 0.3                                    | 0.09                                  | 5                      | 49.7                                   | 10.40                                  | [1]  |
| Activated carbon (AC) derived from | 479.0                            | 479.0                              | 0.14                                   | 0.14                                  | N/A                    | N/A                                    | 78.84                                  | [2]  |

|                                                          |         |       |        |       |       |       |       |           |
|----------------------------------------------------------|---------|-------|--------|-------|-------|-------|-------|-----------|
| <b>waste coconut buttons</b>                             |         |       |        |       |       |       |       |           |
| <b>Banana peel activated carbon</b>                      | 456.54  | N/A   | N/A    | N/A   | 2.77  | 30.7  | 45.6  | [3]       |
| <b>Olive stone activated carbon</b>                      | 1280.71 | 379   | 0.604  | N/A   | 4.63  | 11.72 | N/A   | [4]       |
| <b>Pine cone activated carbon</b>                        | 1094.1  | 613   | 1.09   | 0.39  | N/A   | N/A   | 27.53 | [5]       |
| <b>Coffee residue activated carbon</b>                   | 890     | N/A   | 0.772  | N/A   | N/A   | N/A   | 63    | [6]       |
| <b>mesoporous carbon derived from SBA-15 and sucrose</b> |         |       |        |       |       |       |       |           |
| <b>Commercial activated carbon (Chemviron Carbon)</b>    | 4273    | 3697  | 2.66   | 2.4   | 4.48  | 17.23 | 16.84 | [8]       |
| <b>Cashew nut shell activated carbon</b>                 | 1026    | N/A   | 0.5789 | N/A   | 22.57 | 14.29 | 28.9  | [9]       |
| <b>Saw dust activated carbon</b>                         | 696.7   | 617.4 | 0.405  | 0.284 | 2.53  | NA    | 58.25 | [10]      |
| <b>Tire activated carbon</b>                             | 131.6   | 62.89 | 0.619  | 0.029 | 2.81  | N/A   | 50.48 |           |
| <b>Acrylic fiber activated carbon</b>                    | 781.3   | 650.5 | 1.334  | 0.299 | 2.23  | N/A   | 31.25 |           |
| <b>Rice husk activated carbon</b>                        | 1014.4  | 886.1 | 0.713  | 0.410 | 2.25  | N/A   | 59.73 |           |
| <b>HPC1221</b>                                           | 907     | 112   | 2.8    | 0.05  | 12    | 12.3  | 89    | This work |

*N/A: information is not available*

## References

1. Nieto-Márquez, A.; Pinedo-Flores, A.; Picasso, G.; Atanes, E.; Kou, R.S. Selective adsorption of Pb<sup>2+</sup>, Cr<sup>3+</sup> and Cd<sup>2+</sup> mixtures on activated carbons prepared from waste tires. *J. Environ. Chem. Eng.* **2017**, *5*, 1060–1067, doi:10.1016/j.jece.2017.01.034.
2. Anirudhan, T.; Sreekumari, S. Adsorptive removal of heavy metal ions from industrial effluents using activated carbon derived from waste coconut buttons. *J. Environ. Sci.* **2011**, *23*, 1989–1998, doi:10.1016/s1001-0742(10)60515-3.

3. Li, Y.; Liu, J.; Yuan, Q.; Tang, H.; Yu, F.; Lv, X. A green adsorbent derived from banana peel for highly effective removal of heavy metal ions from water. *RSC Adv.* **2016**, *6*, 45041–45048, doi:10.1039/c6ra07460j.
4. Alslaibi, T.M.; Abustan, I.; Ahmad, M.A.; Abu Foul, A. Cadmium removal from aqueous solution using microwaved olive stone activated carbon. *J. Environ. Chem. Eng.* **2013**, *1*, 589–599, doi:10.1016/j.jece.2013.06.028.
5. Momčilović, M.; Purenović, M.; Bojić, A.; Zarubica, A.; Randelović, M. Removal of lead(II) ions from aqueous solutions by adsorption onto pine cone activated carbon. *Desalination* **2011**, *276*, 53–59, doi:10.1016/j.desal.2011.03.013.
6. Boudrahem, F.; Aissani-Benissad, F.; Aït-Amar, H. Batch sorption dynamics and equilibrium for the removal of lead ions from aqueous phase using activated carbon developed from coffee residue activated with zinc chloride. *J. Environ. Manag.* **2009**, *90*, 3031–3039, doi:10.1016/j.jenvman.2009.04.005.
7. Lu, L.; Zhao, H.; Yan, L.; Wang, G.; Mao, Y.; Wang, X.; Liu, K.; Liu, X.; Zhao, Q.; Jiang, T. Removal characteristics of Cd(II) ions from aqueous solution on ordered mesoporous carbon. *Korean J. Chem. Eng.* **2015**, *32*, 2161–2167, doi:10.1007/s11814-015-0150-7.
8. Asuquo, E.; Martin, A.; Nzerem, P.; Siperstein, F.; Fan, X. Adsorption of Cd(II) and Pb(II) ions from aqueous solutions using mesoporous activated carbon adsorbent: Equilibrium, kinetics and characterisation studies. *J. Environ. Chem. Eng.* **2017**, *5*, 679–698, doi:10.1016/j.jece.2016.12.043.
9. Tangjuank, S.; Insuk, N.; Tontrakoon, J.; Udeye, V. Adsorption of Lead (II) and Cadmium (II) ions from aqueous solutions by adsorption on activated carbon prepared from cashew nut shells. *World Acad. Sci. Eng. Technol.* **2009**, *3*, 110–116.
10. Song, M.; Wei, Y.; Cai, S.; Yu, L.; Zhong, Z.; Jin, B. Study on adsorption properties and mechanism of Pb<sup>2+</sup> with different carbon based adsorbents. *Sci. Total Environ.* **2018**, *618*, 1416–1422, doi:10.1016/j.scitotenv.2017.09.268.
